# Supplementary material for: Hierarchical structure based on Pd(Au) nanoparticles grafted onto magnetite cores and double layered shells: enhanced activity for catalytic applications
Source: Royal Society of Chemistry journal article supplement (doi:10.1039/c3ta12814h), 2013-01-01
Supplement: c3ta12814h.pdf [file c3ta12814h.pdf]

# Supporting Information

## **Hierarchical Structure Based on Pd (Au) Nanoparticles Grafted onto Magnetite Cores and Double Layered Shells: Enhanced Activity for Catalytic Application**

Qin Wang,<sup>†</sup> Wenjing Jia,<sup>†</sup> Baocang Liu,<sup>†</sup> Alideertu Dong,<sup>†</sup> Xia Gong,<sup>†</sup> Changyan Li,<sup>†</sup> Peng Jing,<sup>†</sup> Yingjun Li,<sup>†</sup> Guangran Xu,<sup>†</sup> and Jun Zhang<sup>†</sup> \*

<sup>†</sup>College of Chemistry and Chemical Engineering  
Inner Mongolia University, Hohhot 010021, P. R. China

Fax: 0086 471 4992278, Tel.: 0086 471 4992175  
E-mail: cejzhang@imu.edu.cn, qinwang@imu.edu.cn

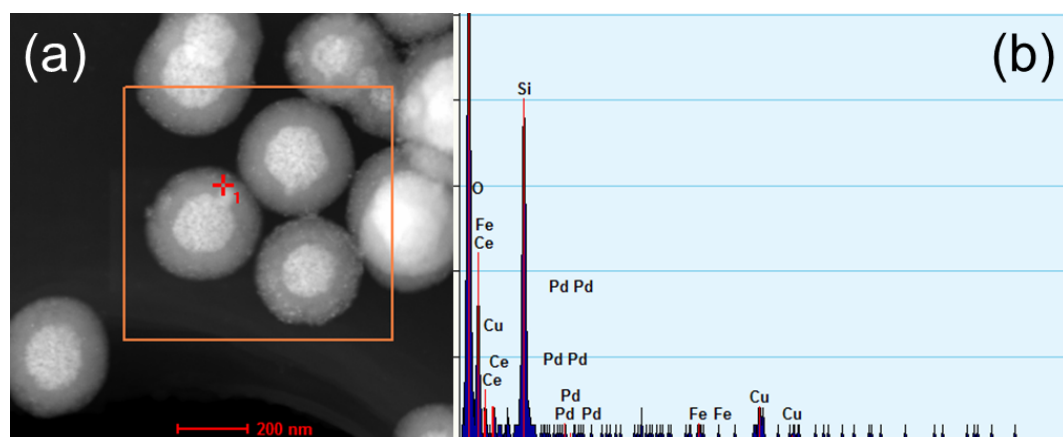

**Figure S1.** (a) High angle annular dark field-scanning transmission electron microscopy (HAADF-STEM) image of  $\text{Fe}_3\text{O}_4@\text{SiO}_2@\text{CeO}_2/\text{Pd}$  microspheres, (b) the corresponding EDX spectra of  $\text{Fe}_3\text{O}_4@\text{SiO}_2@\text{CeO}_2/\text{Pd}$  microspheres.

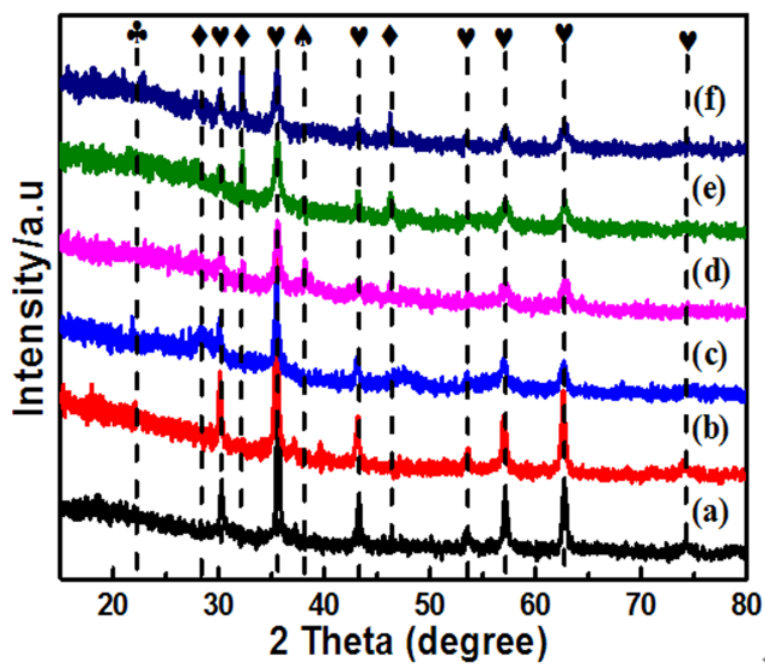

**Figure S2.** XRD patterns of (a) Fe<sub>3</sub>O<sub>4</sub>, (b) Fe<sub>3</sub>O<sub>4</sub>@SiO<sub>2</sub>, (c) Fe<sub>3</sub>O<sub>4</sub>@SiO<sub>2</sub>@CeO<sub>2</sub>, (d) Fe<sub>3</sub>O<sub>4</sub>@SiO<sub>2</sub>@CeO<sub>2</sub>/Au, (e) Fe<sub>3</sub>O<sub>4</sub>@SiO<sub>2</sub>@CeO<sub>2</sub>/Pd, (f) Fe<sub>3</sub>O<sub>4</sub>@SiO<sub>2</sub>@CeO<sub>2</sub>/Au-Pd microspheres, where the reflections peaks marked by ♥, ♣, ♦ and ♠ correspond to Fe<sub>3</sub>O<sub>4</sub>, SiO<sub>2</sub>, CeO<sub>2</sub> and Au, respectively.

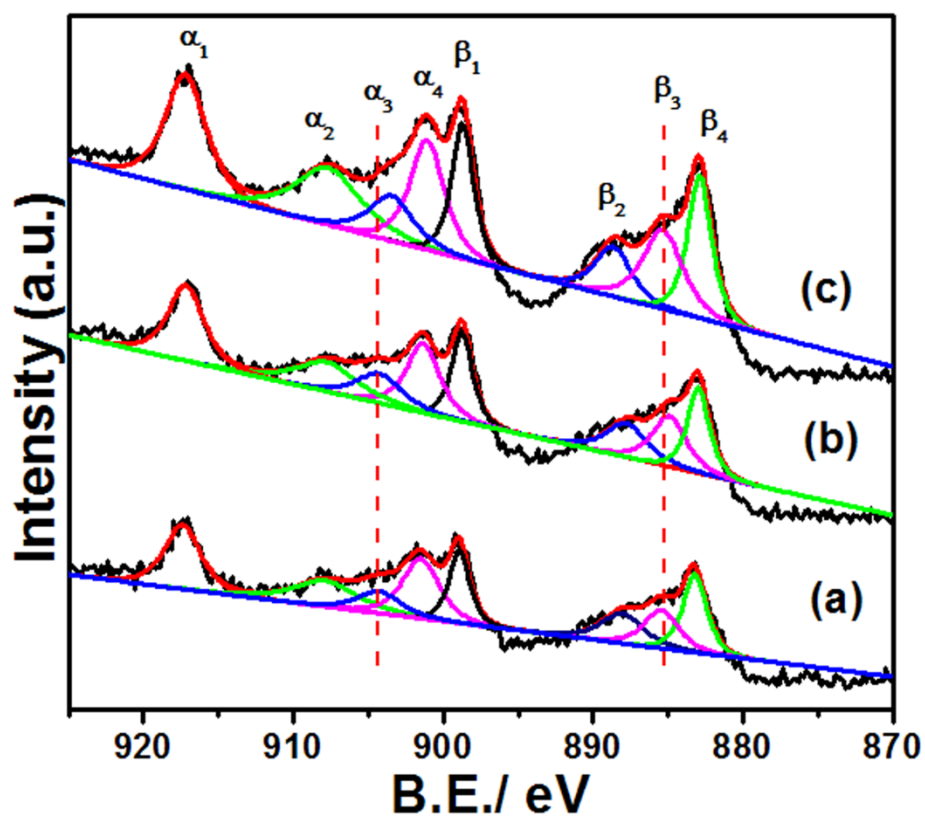

**Figure S3.** Experimental and fitted XPS spectra of the (a) fresh  $\text{Fe}_3\text{O}_4@\text{SiO}_2@\text{CeO}_2/\text{Pd}$  microspheres catalyst; (b) used  $\text{Fe}_3\text{O}_4@\text{SiO}_2@\text{CeO}_2/\text{Pd}$  microspheres catalyst; (c)  $\text{Fe}_3\text{O}_4@\text{SiO}_2@\text{CeO}_2$  support.

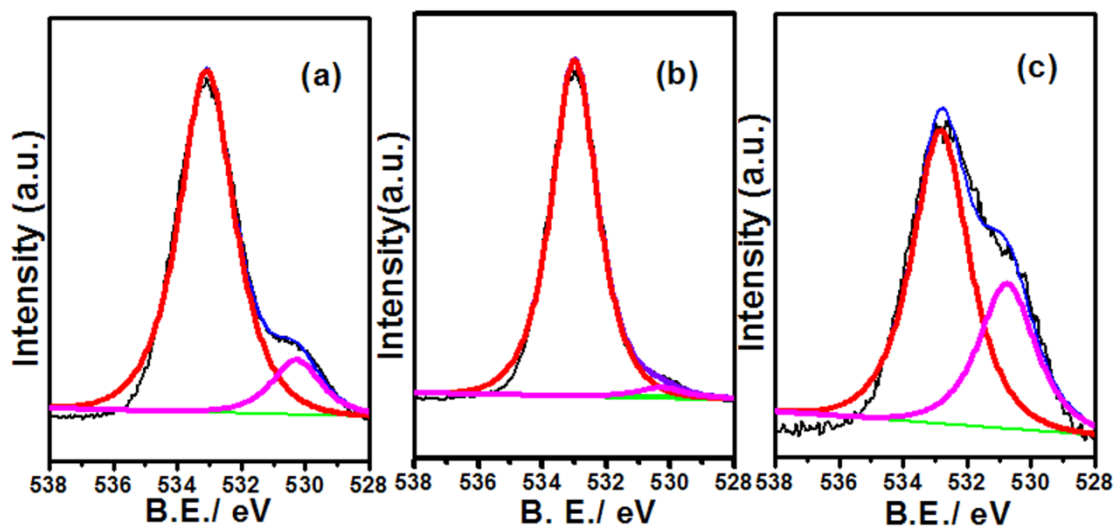

**Figure S4.** Experimental and fitted XPS spectra of O<sub>1s</sub> of the (a) Fe<sub>3</sub>O<sub>4</sub>@SiO<sub>2</sub>@CeO<sub>2</sub> support; (b) fresh Fe<sub>3</sub>O<sub>4</sub>@SiO<sub>2</sub>@CeO<sub>2</sub>/Pd and (c) used Fe<sub>3</sub>O<sub>4</sub>@SiO<sub>2</sub>@CeO<sub>2</sub>/Pd microspheres catalysts.

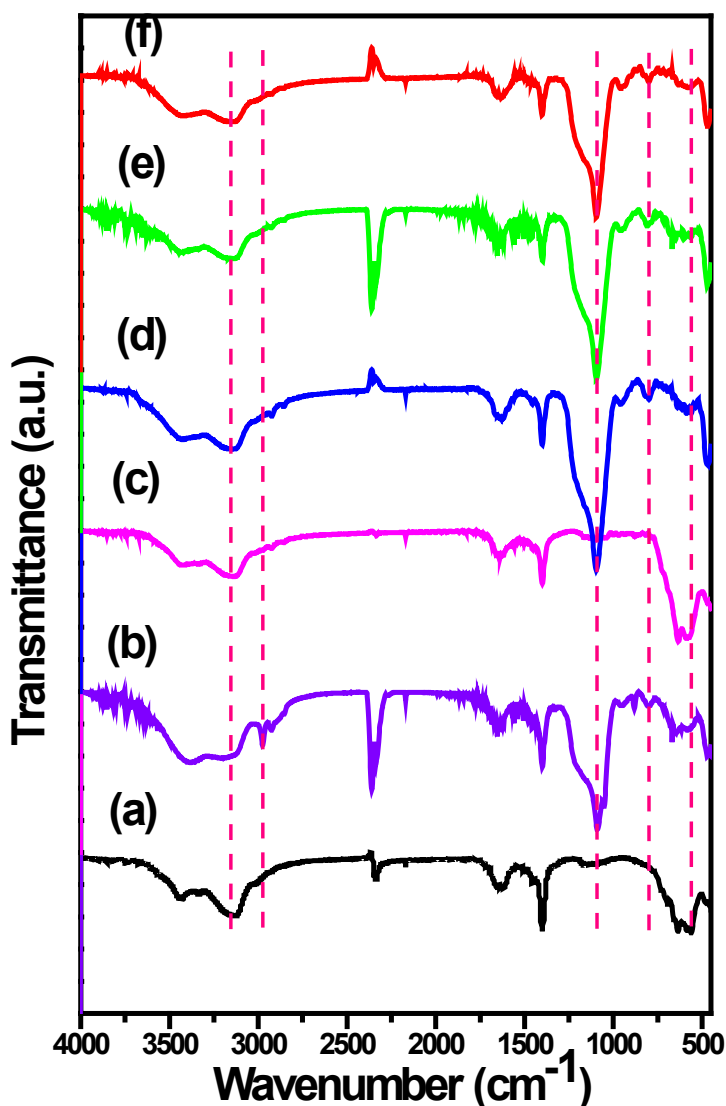

**Figure S5.** FTIR spectra of the as-synthesized  $\text{Fe}_3\text{O}_4/\text{Pd}$  (a),  $\text{Fe}_3\text{O}_4@\text{SiO}_2/\text{Pd}$ (b),  $\text{Fe}_3\text{O}_4@\text{CeO}_2/\text{Pd}$ (c),  $\text{Fe}_3\text{O}_4@\text{SiO}_2@ \text{CeO}_2/\text{Au}$ (d),  $\text{Fe}_3\text{O}_4@\text{SiO}_2@\text{CeO}_2/\text{Pd}$ (e),  $\text{Fe}_3\text{O}_4@\text{SiO}_2@\text{CeO}_2 / \text{Au-Pd}$  (f) microspheres.

To confirm middle silica layer coated on the surface of the magnetite cores, FTIR spectra of the  $\text{Fe}_3\text{O}_4/\text{Pd}$ ,  $\text{Fe}_3\text{O}_4@\text{SiO}_2/\text{Pd}$ ,  $\text{Fe}_3\text{O}_4@\text{CeO}_2/\text{Pd}$ ,  $\text{Fe}_3\text{O}_4@\text{SiO}_2@\text{CeO}_2/\text{Au}$ ,  $\text{Fe}_3\text{O}_4@\text{SiO}_2@\text{CeO}_2/\text{Pd}$ ,  $\text{Fe}_3\text{O}_4@\text{SiO}_2@\text{CeO}_2/\text{Au-Pd}$  microspheres are shown in the Figure S5. The assignments of the strong bands Si-O-Si ( $1089$ ,  $798 \text{ cm}^{-1}$ ) and Si-OH ( $957 \text{ cm}^{-1}$ ) indicates existence of the silica. The peaks at  $633 \text{ cm}^{-1}$ ,  $577 \text{ cm}^{-1}$  and  $563 \text{ cm}^{-1}$  are attributed to Fe-O and Ce-O vibrations, respectively.

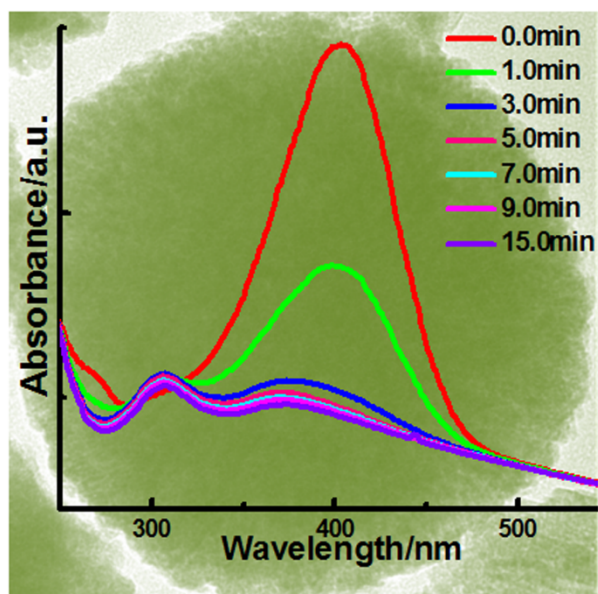

**Figure S6.** UV-Vis absorption spectra for the catalytic reduction of 4-NP to 4-AP over CeO<sub>2</sub>@Pd microspheres catalyst.

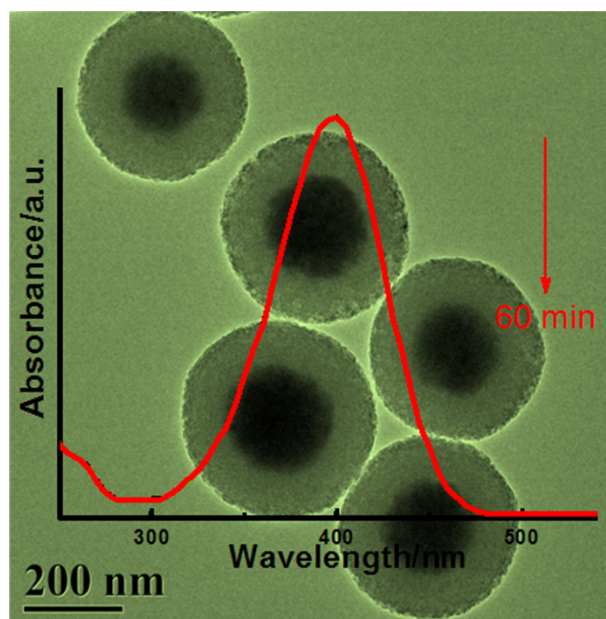

**Figure S7.** UV-Vis absorption spectra for the catalytic reduction of 4-NP to 4-AP over Fe<sub>3</sub>O<sub>4</sub>@SiO<sub>2</sub>@CeO<sub>2</sub> microspheres catalyst.
